# Supplementary material
Source: publisher figshare collection journal article supplement (https://sage.figshare.com/ndownloader/files/14072735)
Supplement: Supplementary file 1 [file 14072735]

## Sheet: data
Sex	Age	Body height	Bodyweight	BMI	Diabetes duration	HbA1c	DR	DN	Exercise habit	KEF	%KEF
men	30	172	79.5	26.9	0	6.8	absence	absence	absence	70.7	88.9308
men	30	174.4	83.4	27.4	1	12.2	absence	absence	absence	48.1	62.6302
men	30	172.1	78	26.3	0	15.7	absence	absence	absence	13.8	19.0345
men	30	164	76.8	28.6	3	12	absence	absence	presence	69.1	82.8537
men	30	160	72.5	28.3	0	12.1	absence	absence	absence	41.3	52.9487
men	31	175	78.4	25.6	0	11.3	absence	absence	absence	47.1	60.0765
men	32	170	78.6	27.2	0	10.3	absence	presence	absence	57.3	72.9008
men	33	166	74	26.9	0	9.7	absence	absence	absence	52.2	70.5405
men	33	165	45	16.5	1	13.3	absence	absence	absence	34.5	33.0144
men	33	175	104.5	34.1	0	11	absence	absence	absence	32.5	72.2222
men	34	170	64	22.1	6	7.2	absence	absence	absence	45.7	71.4062
men	34	176.3	87.5	28.2	0	14	absence	absence	absence	67.3	70.8421
men	34	176	95	30.7	5	8	absence	absence	absence	64.7	61.327
men	34	165	105.5	38.8	0	12	absence	absence	absence	31.2	46.0177
men	34	178.7	67.8	21.2	11	12.6	absence	absence	absence	35.5	40.5714
men	35	169	105.4	36.9	0	11.9	absence	absence	absence	84.8	80.4554
men	36	180	80	24.7	0	7.4	absence	absence	absence	42.3	52.875
men	36	175	93	30.4	1	14.6	absence	absence	absence	44.9	64.5115
men	36	170	69.6	24.1	3	8.4	absence	absence	absence	48	51.0096
men	36	175	94.1	30.7	5	9.9	absence	absence	absence	54.8	54.2574
men	36	184.2	101	29.8	2	10.2	absence	absence	absence	50.9	58.912
men	36	173.5	86.4	28.7	1	10.9	absence	absence	absence	69.2	59.5525
men	36	175	116.2	37.9	0	12.1	absence	presence	absence	43.4	52.9268
men	36	172.7	82	27.5	7	14	absence	presence	absence	44.3	47.6344
men	37	174	83	27.4	2	11.5	absence	absence	absence	49.2	51.7895
men	37	172	95	32.1	0	9.3	absence	absence	absence	36.9	68.207
men	37	165.4	54.1	19.8	7	11.2	absence	absence	presence	36.6	44.0964
men	37	163	67.6	25.4	3	13.2	absence	absence	absence	57.1	84.53
men	38	174	74.8	24.7	0	10.5	absence	absence	absence	38	54.2857
men	38	180.1	107	33	0	12.3	absence	absence	absence	85.8	90.3158
men	38	167.4	70	25	1	7.3	absence	presence	absence	43.5	58.1551
men	38	168	95	33.7	11	9.1	absence	presence	absence	28.9	45.2978
men	38	155.7	63.8	26.3	8	11	absence	presence	absence	52.5	49.0654
men	39	178.6	134.5	42.2	7	12.3	absence	absence	absence	65.7	69.1579
men	39	169	87	30.5	0	12	absence	absence	absence	64.2	57.3727
men	39	160	45.2	17.7	3	15.2	absence	absence	absence	40.4	61.7737
men	39	170	65	22.5	10	18	absence	absence	absence	37.9	43.5632
men	39	190	95	26.3	1	7.4	absence	absence	absence	57.8	42.974
men	39	165.9	111.9	40.7	4	8.9	absence	absence	absence	40.8	58.1197
men	39	174.5	65.4	21.5	1	11.1	absence	absence	absence	49.9	60.4848
men	39	171.5	70.2	23.9	0	12.6	absence	absence	absence	66.1	70.8467
men	39	173.5	82.5	27.4	0	12.9	absence	absence	absence	27.5	60.8407
men	39	175	93.3	30.5	3	13	absence	absence	absence	42.3	65.0769
men	40	165.5	60.6	22.1	0	6.3	absence	absence	absence	36	59.4059
men	40	175.8	105.6	34.2	2	6.3	absence	absence	absence	28.4	26.8939
men	40	179.5	89.9	27.9	4	6.9	absence	absence	absence	54.9	61.1018
men	40	173	127.3	42.5	3	8.7	absence	absence	absence	51.7	40.6127
men	40	164	64	23.8	1	9	absence	absence	absence	26.6	41.5625
men	40	155	59	24.6	1	11.1	absence	absence	absence	32.6	55.2542
men	40	175	72	23.5	0	11.8	absence	absence	presence	43.1	59.8611
men	40	160.5	99.3	38.5	0	14.8	absence	absence	absence	47.3	47.6334
men	41	166.7	69.8	25.1	0	10.9	absence	absence	absence	44.4	49.6089
men	41	167	66.2	23.7	0	12.6	absence	absence	absence	42.7	45.6197
men	41	183	73	21.8	0	11.5	absence	absence	absence	49.3	66.2634
men	41	178.4	93.6	29.4	1	9.7	absence	absence	absence	50.8	57.6617
men	41	168	74.4	26.4	0	10	presence	absence	absence	38.3	50
men	41	178	88.1	27.8	3	10.2	absence	absence	absence	45.6	65.3295
men	41	169	76.6	26.8	2	10.8	absence	absence	absence	47.9	58.8452
men	41	177	83.7	26.7	3	11.3	absence	absence	absence	50.6	43.1005
men	41	175	80	26.1	6	11.7	absence	absence	absence	54.5	65.1135
men	41	174.5	68	22.3	0	11.9	absence	absence	absence	32.5	44.5206
men	41	174	90.3	29.8	3	12.8	absence	absence	absence	42.3	52.875
men	41	169	117.4	41.1	17	11.1	presence	absence	absence	38.9	57.2059
men	41	171.8	71.8	24.3	0	13.7	absence	absence	absence	36.2	54.6828
men	41	180	81.4	25.1	2	10.9	absence	presence	absence	43.5	48.1728
men	41	175.7	89.5	29	11	9.5	absence	presence	absence	47.4	66.0167
men	42	179.6	109.6	34	0	8.2	absence	absence	absence	22.1	32.9851
men	42	172	93.1	31.5	1	7.9	absence	absence	absence	30.2	32.4382
men	42	179	87.7	27.4	0	12.9	absence	absence	absence	35.3	32.208
men	42	161	68.5	26.4	2	13.8	absence	absence	presence	34.2	40.188
men	42	180	67	20.7	8	7.5	presence	absence	absence	45.7	68.209
men	42	173.8	85.1	28.2	3	9.5	absence	absence	absence	45.7	68.209
men	42	165	67	24.6	2	9.7	absence	absence	presence	43.8	43.6255
men	42	165	67	24.6	2	9.7	absence	absence	presence	43.4	62.9442
men	42	168	69	24.4	1	12.2	absence	absence	absence	43.9	50.057
men	42	163	66	24.8	0	13.1	absence	absence	absence	34.5	52.2727
men	42	164.7	83.1	30.6	0	14.3	absence	absence	absence	47.8	69.781
men	42	161	100.4	38.7	13	12	absence	absence	absence	56.9	68.4717
men	43	177	78	24.9	0	6	absence	absence	absence	72.5	92.9487
men	43	174.2	66.9	22	10	11.7	presence	absence	absence	71.6	72.0322
men	43	175.5	74	24	4	14	absence	absence	presence	61.8	68.6667
men	43	171.5	62.5	21.2	4	14.2	absence	absence	absence	27	28.632
men	43	170	56.6	19.6	1	14.7	absence	absence	absence	34	58.4192
men	43	174.6	99.4	32.6	15	8.2	absence	absence	absence	34.2	46.2162
men	43	175.6	94.3	30.6	2	10.5	absence	absence	absence	45.4	61.7687
men	43	170	58.2	20.1	0	10.6	absence	absence	absence	43.1	64.4245
men	43	175.2	74	24.1	2	11	absence	absence	absence	43.3	58.5135
men	43	162	73.5	28	3	11.2	absence	absence	absence	41.5	66.4
men	43	180	90	27.8	0	9.8	absence	presence	absence	39.4	69.6113
men	44	176.6	87.5	28.1	3	7.2	absence	absence	absence	16.8	24.7788
men	44	169.2	78.3	27.4	4	8.4	absence	absence	absence	81.1	92.6857
men	44	171.3	91.6	31.2	1	9.6	absence	absence	absence	44.2	56.4496
men	44	167	69	24.7	9	9.7	absence	absence	absence	63.8	69.6507
men	44	169	89.8	31.4	3	10.8	absence	absence	absence	44.5	64.4928
men	44	165.2	73	26.7	0	12.8	absence	absence	absence	59.2	65.055
men	44	169	93	32.6	5	14.4	absence	absence	absence	61.6	68.5969
men	44	165.8	88.8	32.3	2	11.3	absence	absence	absence	51.5	57.9955
men	44	155.8	67.8	27.9	14	6.5	absence	absence	absence	32.3	44.2466
men	44	168.8	91	31.9	16	10.6	presence	presence	absence	49.7	53.4409
men	45	162.7	69	26.1	2	8.7	absence	absence	presence	24.1	33.0137
men	45	176.6	54.6	17.5	0	11.1	absence	absence	absence	56.7	49.3043
men	45	179.4	115	35.7	1	6.6	absence	absence	absence	38.5	68.2624
men	45	164.8	56.4	20.8	1	8.1	absence	absence	absence	47.5	68.8406
men	45	171.5	89.6	30.5	10	8.8	absence	absence	absence	69.7	77.7902
men	45	177	74	23.6	7	8.9	absence	absence	absence	35.5	49.7896
men	45	174	71.3	23.6	10	8.8	absence	absence	presence	54	72.973
men	45	174.2	71.1	23.4	2	9.3	absence	absence	absence	49.2	69.1983
men	45	162.6	63.3	23.9	4	11.2	absence	absence	absence	30.7	56.2271
men	45	181	104	31.7	7	11.8	absence	absence	presence	39.3	62.0853
men	45	156.6	68.7	28	4	12.6	absence	absence	absence	63.1	60.6731
men	45	165	73	26.8	7	6.3	absence	presence	absence	28.8	41.9519
men	45	164.5	76	28.1	1	15	absence	presence	absence	44	57.5916
men	45	170	76.4	26.4	0	14.1	absence	presence	absence	45.7	60.1316
men	46	161.3	66.9	25.7	0	13.7	absence	absence	absence	34.8	52.7273
men	46	167.4	77	27.5	3	14.2	absence	absence	absence	59.1	56.2857
men	46	179.3	75.4	23.4	8	8	absence	absence	presence	42.4	56.2707
men	46	178	77.5	24.5	1	9.1	absence	absence	absence	37.5	48.3871
men	46	174.8	79.3	26	8	10.5	absence	absence	absence	42.6	53.7201
men	46	179	83.2	26	3	10.8	absence	absence	absence	56.9	68.3894
men	46	157.8	80.8	32.4	3	10.9	absence	absence	absence	46.8	57.9208
men	46	176	75	24.2	0	11.6	absence	absence	absence	44.1	58.8
men	46	154.4	65.4	27.4	0	12.1	absence	absence	presence	30.5	46.6361
men	46	171	86.3	29.5	1	12.4	absence	absence	presence	53.4	61.8772
men	46	168	66	23.4	6	7	absence	presence	absence	51.9	77.5785
men	46	172	105	35.5	5	7.6	absence	presence	absence	34.2	44.4156
men	47	164	75.5	28.1	1	6.8	absence	absence	absence	36.5	53.4407
men	47	168.7	68.3	24	3	6.7	absence	absence	absence	36	47.6821
men	47	170.9	93	31.8	0	9.4	absence	absence	absence	38.5	37.7451
men	47	165.3	74.5	27.3	0	10.6	absence	absence	absence	42	43.7956
men	47	176	70.8	22.9	3	11	absence	absence	absence	61.4	66.0215
men	47	179.4	75	23.3	10	12.6	absence	absence	absence	38.8	52.0805
men	47	178	102	32.2	10	8.9	absence	absence	absence	34.6	48.8701
men	47	168	95.9	34	4	9.3	absence	absence	absence	42.9	57.2
men	47	177	92.3	29.5	2	12.7	absence	presence	absence	50.3	54.4962
men	48	167	61	21.9	1	8.1	absence	absence	presence	38.4	52.8198
men	48	168.8	81	28.4	1	8.9	presence	absence	presence	30.2	49.5082
men	48	163.3	58.8	22	10	11.3	absence	absence	absence	33.5	41.358
men	48	158	72.7	29.1	4	6.4	presence	absence	absence	44.5	61.0425
men	48	171.1	70.3	24	3	10.3	absence	absence	absence	41.2	58.606
men	48	169.5	60.8	21.2	8	11.3	absence	absence	presence	29.2	42.1356
men	48	166	69.3	25.1	2	10.6	absence	absence	absence	24.6	41.8367
men	48	158	68	27.2	1	14.3	absence	absence	absence	54.5	89.6382
men	48	167.7	72.9	25.9	14	9.2	presence	presence	absence	47	69.1176
men	49	176.9	73	23.3	0	6.4	absence	absence	presence	18.9	31.3954
men	49	166.5	76.2	27.5	4	6.5	absence	absence	presence	70	95.8904
men	49	166.5	83.2	30	17	11.8	absence	absence	absence	61.5	80.7087
men	49	178.8	88.5	27.7	0	13.1	absence	absence	absence	74.2	97.2477
men	49	156.4	42.1	17.2	4	15	absence	absence	absence	63.6	58.0292
men	49	165.5	76.3	27.9	2	6.9	absence	absence	presence	48.9	57.5972
men	49	174.5	109.6	36	2	7	absence	absence	absence	31.2	41.6
men	49	170	84.9	29.4	6	7.8	absence	absence	presence	77.8	87.4157
men	49	173	75	25.1	11	8.8	absence	absence	absence	31.8	51.3732
men	49	170	87.3	30.2	1	12.4	absence	absence	absence	38.5	52.7397
men	49	171.8	88	29.8	4	13	absence	absence	absence	43.5	52.2837
men	49	174.4	89	29.3	8	10	absence	presence	absence	45.4	52.0046
men	49	168	61.9	21.9	2	10.9	absence	presence	absence	61.7	70.1136
men	49	177	73	23.3	10	11.3	absence	presence	absence	65.1	73.5593
men	49	162.1	60.2	22.9	9	6.3	presence	presence	absence	24.3	57.7197
men	50	165	62	22.8	22	8.4	absence	absence	absence	42.9	55.1414
men	50	160	77.1	30.1	1	8.4	absence	absence	absence	40.6	65.4839
men	50	160.5	58.5	22.7	15	9.8	absence	absence	presence	30.4	39.4293
men	50	172.5	70.5	23.7	0	9.9	absence	absence	absence	26.6	45.4701
men	50	170	65.2	22.6	7	10	absence	absence	absence	49.5	70.2128
men	50	170	93.6	32.4	1	11.2	absence	absence	absence	47.3	72.546
men	50	169.3	67.6	23.6	2	11.8	absence	absence	absence	68.2	72.8632
men	50	175.1	77.8	25.4	20	7.4	presence	absence	absence	53.9	79.7337
men	50	165.2	65.5	24	1	12.2	absence	absence	absence	38.4	58.626
men	50	166.2	67.2	24.3	0	15	presence	presence	absence	25.8	38.3929
men	51	178.5	78.3	24.6	3	7.9	absence	absence	absence	46.5	68.082
men	51	169.8	67.9	23.6	0	11.2	absence	absence	absence	51.2	65.3895
men	51	170.1	69.4	24	0	17.1	absence	absence	absence	49.1	53.3696
men	51	169	68.5	24	0	9.7	absence	absence	absence	40	58.3942
men	51	166	72.5	26.3	10	10.1	absence	absence	absence	62.9	86.7586
men	51	165	71.7	26.3	10	10.1	absence	absence	absence	62.9	87.7266
men	51	169.1	71.3	24.9	4	11.6	absence	absence	presence	31.6	46.539
men	51	173	69	23.1	0	12	absence	absence	absence	48.5	68.0224
men	51	170	84.2	29.1	3	13.9	absence	absence	absence	43.8	67.075
men	51	172	92	31.1	10	8.2	absence	absence	absence	42	60.8696
men	51	171.4	65.3	22.2	5	11.8	absence	absence	absence	22.8	27.0784
men	51	177	68.3	21.8	6	6.8	presence	presence	absence	39.6	57.0605
men	52	153.2	104.6	44.6	1	5.6	absence	absence	absence	27.5	26.2906
men	52	169.5	99.5	34.6	9	9	absence	absence	absence	37.6	44.9223
men	52	172.7	80.9	27.1	3	8.7	absence	absence	absence	47.8	61.9171
men	52	179.5	89.5	27.8	3	8.7	absence	absence	presence	51.2	71.4086
men	52	167.9	59.5	21.1	1	11.8	absence	absence	absence	37.7	46.6007
men	52	170	64	22.1	0	12.9	absence	absence	absence	39.2	43.7989
men	52	164.5	48.6	18	6	17.5	presence	absence	absence	50.2	73.7151
men	52	177.2	83.7	26.7	9	6.9	absence	absence	presence	74.5	74.8744
men	52	173	77.2	25.8	0	7.3	absence	absence	absence	36.1	41.1631
men	52	166.8	71.7	25.8	3	7.6	absence	absence	presence	34.8	35.8763
men	52	176	68.1	22	1	8.7	absence	absence	presence	31.4	52.7731
men	52	169	97	34	0	11.3	presence	absence	absence	46.9	61.6294
men	52	165.5	76.1	27.8	1	12.5	absence	absence	absence	41.1	64.2188
men	52	171.5	67.2	22.8	2	15.2	absence	presence	absence	36.4	54.1667
men	52	168	87.7	31.1	18	9.1	absence	presence	absence	12.6	25.9259
men	53	170.5	61	21	0	11.2	absence	absence	absence	38.6	58.5736
men	53	165	65.9	24.2	9	6.1	absence	absence	presence	45.3	76.7797
men	53	166	59	21.4	0	7.1	absence	absence	absence	56.2	71.1392
men	53	175	79	25.8	8	8.6	absence	absence	absence	44.2	48.3324
men	53	170	91.5	31.6	3	8.7	absence	absence	absence	46.2	62.0551
men	53	176.3	74.5	24	10	9	presence	absence	absence	40.5	58.1062
men	53	172.4	84.8	28.5	4	10.5	absence	absence	absence	44.7	61.7403
men	53	173.3	74	24.6	7	19.1	absence	absence	absence	44.4	51.8086
men	53	165.8	69.7	25.4	10	9.3	presence	absence	absence	25	45.2899
men	53	167	55.2	19.8	2	10.2	absence	absence	presence	19.8	23.3491
men	53	180	90.4	27.9	10	12.6	absence	absence	absence	63.7	77.2121
men	53	166.6	85.7	30.9	21	9.9	presence	absence	absence	34.2	56.0656
men	53	182.3	82.5	24.8	7	10.6	absence	presence	presence	56.5	62.5
men	53	168.7	72.4	25.4	11	9.4	presence	presence	absence	41.1	55.5405
men	54	158.2	47.9	19.1	0	5.6	absence	absence	absence	24	50.1567
men	54	171.2	79.5	27.1	10	5.9	absence	absence	presence	54.6	68.6792
men	54	179.8	74.6	23.1	2	6.1	absence	absence	presence	59.9	80.3488
men	54	164	62.1	23.1	11	11	absence	absence	absence	56.3	85.174
men	54	168.5	66.1	23.3	2	6.9	absence	absence	absence	44.7	64.7826
men	54	164.4	69	25.5	5	7.3	absence	absence	absence	23.5	29.6343
men	54	162.1	107	40.7	1	8.9	absence	absence	absence	53.4	49.9065
men	54	177.5	94.1	29.9	4	9.3	absence	absence	presence	64.6	68.6504
men	54	168.2	60.7	21.5	3	10.3	absence	absence	absence	33.5	55.1895
men	54	187.5	70	19.9	13	11.5	presence	absence	absence	43.7	48.991
men	54	181.7	79.3	24	1	7.4	presence	absence	presence	46.8	75.3623
men	54	163.6	61.6	23	1	11.5	absence	absence	absence	26.7	38.1429
men	54	168	60.9	21.6	11	12.5	absence	absence	absence	47.8	77.5974
men	54	172	89.2	30.2	7	10.8	absence	presence	absence	40.4	66.3383
men	55	171	92.7	31.7	2	9.3	absence	absence	absence	35.4	58.3677
men	55	172	100.9	34.1	1	7.1	absence	absence	absence	54.4	53.9148
men	55	168.5	72.4	25.5	5	7.2	absence	absence	absence	37.4	51.6932
men	55	171.4	75	25.5	10	10.7	absence	absence	absence	56.3	60.7335
men	55	161.2	62	23.9	23	10.5	absence	absence	absence	31.1	50.1613
men	55	170	60.7	21	8	6.8	presence	presence	absence	47.7	63.6
men	55	159.3	94.2	37.1	15	11.4	absence	presence	presence	39	41.4013
men	55	168.9	56.8	19.9	14	12.1	absence	presence	absence	44.9	79.0493
men	56	166	73.1	26.5	4	7.3	absence	absence	absence	42.1	61.0145
men	56	170.9	76	26	7	8.3	absence	absence	absence	48.3	66.1191
men	56	170.1	67.7	23.4	1	10	absence	absence	absence	50.4	60.5769
men	56	175.2	78.6	25.6	1	10.8	absence	absence	absence	41.9	55.1316
men	56	164.7	83.2	30.7	18	7.8	absence	absence	absence	55.9	83.8081
men	56	161	66.7	25.7	11	8.5	presence	absence	absence	41.3	56.5753
men	56	158.4	73	29.1	0	9.1	absence	absence	absence	41.8	61.743
men	56	174.3	131	43.1	11	10.1	absence	absence	absence	66	50.3817
men	56	173	98	32.7	5	10.8	absence	absence	absence	42.7	54.3257
men	56	166.1	76.7	27.8	1	11.5	absence	absence	absence	49.6	50.6122
men	56	171.8	67.3	22.8	3	13.2	absence	absence	absence	47.5	61.9296
men	56	172.7	69	23.1	6	7.2	presence	presence	presence	50.8	75.4829
men	57	163.8	50.4	18.8	4	14	absence	absence	absence	44.9	61.0054
men	57	179.2	73.6	22.9	10	8.5	absence	absence	presence	35.4	47.2315
men	57	166	75	27.2	12	8.5	absence	absence	absence	53.3	69.9934
men	57	172.5	71.4	24	0	9.7	presence	absence	absence	30	42.0168
men	57	171.8	91.5	31	0	9.7	absence	absence	absence	55.6	60.7983
men	57	169	95.8	33.5	3	12.3	absence	absence	presence	47	71.1044
men	57	182.1	66.1	19.9	2	10.3	absence	absence	presence	22.6	22.1786
men	57	169.6	101.9	35.4	6	10.5	presence	absence	absence	50.2	51.8595
men	57	169.5	63.4	22.1	27	13	absence	absence	absence	36.8	38.4134
men	57	169.7	76.2	26.4	0	8.7	absence	presence	absence	35.2	55.5205
men	57	180	96.8	29.9	18	10.6	presence	presence	absence	28.2	55.9524
men	58	167.5	75.7	27	19	9	absence	absence	absence	56.9	71.125
men	58	160.5	50.2	19.5	5	10.6	absence	absence	absence	58.4	79.2402
men	58	177	85	27.1	1	13.6	absence	absence	absence	30.6	40.4227
men	58	169	75.5	26.4	1	15.3	absence	absence	absence	52.4	77.0588
men	58	171	80	27.4	10	8.6	absence	absence	presence	50.2	69.4329
men	58	166.6	73.7	26.6	0	8.9	absence	absence	absence	34.8	69.3227
men	58	176	68	22	0	9.5	absence	absence	absence	32.7	50.541
men	58	163.7	64.7	24.1	4	11.2	absence	absence	absence	38.6	69.5495
men	58	171.5	72.1	24.5	0	15.1	absence	absence	absence	57.1	80.4225
men	58	162.3	55.5	21.1	1	11.2	absence	absence	absence	40.6	58.7554
men	58	171	69.1	23.6	10	12.7	absence	absence	absence	10.8	21.6867
men	58	171	72.3	24.7	13	9.8	presence	presence	absence	56.3	66.2353
men	58	163.5	49.8	18.6	8	13.4	absence	presence	absence	45.9	63.6616
men	58	173	71	23.7	1	11.3	presence	presence	absence	41.5	54.9669
men	59	169	60.2	21.1	0	15.3	absence	absence	absence	42.9	51.0714
men	59	160	62	24.2	3	13.3	absence	absence	absence	60.9	88.7755
men	59	170.5	68.6	23.6	2	6.9	absence	absence	presence	54.45	87.9645
men	59	158.3	61.9	24.7	12	7.2	absence	absence	absence	25.5	33.0311
men	59	171.3	77.2	26.3	12	7.4	absence	absence	presence	46.6	65.6338
men	59	171.6	57.1	19.4	23	8.2	presence	absence	absence	38.1	52.9903
men	59	173	73.8	24.7	16	8.5	absence	absence	presence	36.3	63.5727
men	59	169	68.7	24.1	2	9.6	absence	absence	absence	45	58.7467
men	59	166.3	60.4	21.8	14	14.2	absence	absence	absence	53.3	65.3186
men	59	176	71	22.9	11	7.7	absence	absence	absence	40.2	54.4715
men	59	170	71.9	24.9	1	8.2	presence	presence	absence	57.4	83.5517
men	59	163.5	84	31.4	4	6.5	absence	presence	absence	27.6	46
men	59	175.5	76.6	24.9	19	8.3	presence	presence	presence	29.4	47.4194
men	59	168	60	21.3	29	11.8	absence	presence	absence	30.7	50.8278
men	59	169.6	81.6	28.4	0	8.5	absence	presence	absence	33.7	55.9801
men	60	171	78	26.7	0	6.1	absence	absence	presence	50.4	64.6154
men	60	165	62.8	23.1	1	6.4	absence	absence	absence	47.6	75.7962
men	60	170	57.7	20	0	7.9	absence	absence	absence	38.1	55.3779
men	60	163.5	70.8	26.5	0	9.3	absence	absence	absence	48.1	91.6191
men	60	176.3	60.8	19.6	40	7.2	absence	absence	absence	31.6	43.1105
men	60	172.6	58	19.5	7	8	absence	absence	absence	36.5	60.0329
men	60	175	61	19.9	0	9.4	absence	absence	absence	37.5	67.7507
men	60	166.4	68.8	24.8	15	6.7	absence	absence	absence	25.3	43.8475
men	60	159	52.5	20.8	10	6.9	presence	absence	absence	51.8	79.9383
men	60	175	73.3	23.9	8	7.1	absence	absence	presence	49.4	85.1724
men	60	177	85.2	27.2	15	9.2	absence	absence	presence	38.4	45.6599
men	60	171	71.8	24.6	2	9.9	absence	absence	absence	50.4	59.1549
men	60	166.7	45	16.2	3	11.8	absence	absence	absence	51.2	72.3164
men	60	163.8	84.1	31.3	0	8.8	absence	absence	absence	32.1	52.623
men	60	175.6	71	23	0	10.1	absence	presence	absence	30.1	41.922
men	60	165	64.8	23.8	23	7.9	absence	presence	absence	33.9	47.7465
men	60	161.3	55.4	21.3	2	7.5	absence	presence	presence	23.7	52.6667
men	61	176	70	22.6	5	6.6	absence	absence	absence	40.3	59.9702
men	61	152.5	58.6	25.2	1	7.3	presence	absence	absence	40.5	64.2857
men	61	172	77.8	26.3	36	8.1	absence	absence	absence	50.5	80.1587
men	61	169	67.2	23.5	8	6.2	absence	absence	presence	38.3	54.7143
men	61	174	63	20.8	8	6.4	presence	absence	absence	38.4	61.9355
men	61	166	63	22.9	8	6.4	presence	absence	absence	50.7	78
men	61	173	62	20.7	9	6.6	absence	absence	presence	44.4	62.4473
men	61	159	65	25.7	5	6.6	presence	absence	presence	35.1	59.8976
men	61	164.8	71.1	26.2	9	6.9	absence	absence	absence	33.8	62.5926
men	61	165.4	54	19.7	10	7.4	absence	absence	absence	40.2	54.6939
men	61	170	80.9	28	9	7.8	presence	absence	presence	51.6	63.7824
men	61	160	59.4	23.2	7	8.1	absence	absence	absence	9.6	12.3393
men	61	162.7	62.1	23.5	20	8.6	absence	absence	absence	35.4	59.596
men	61	165.4	59	21.6	0	10.1	absence	absence	absence	28.2	45.4106
men	61	167	66.7	23.9	0	10.7	presence	absence	absence	64.6	72.5843
men	61	169	80.6	28.2	2	10.8	absence	absence	absence	45.7	67.6035
men	61	161.5	73.5	28.2	12	7.6	absence	absence	presence	25.7	45.0877
men	61	147.7	46.2	21.2	1	11.2	absence	absence	absence	41.7	70.678
men	61	157	67.6	27.4	0	9	absence	presence	presence	39.9	59.8201
men	61	172	84.5	28.6	13	12.2	absence	presence	absence	58.3	72.3325
men	61	161.8	57	21.8	10	9.6	absence	presence	absence	25.5	55.1948
men	61	183.2	89	26.5	9	8.6	absence	presence	absence	54.6	64.6154
men	62	166.5	67.8	24.5	2	5.9	absence	absence	absence	25.7	37.9056
men	62	164.5	60.6	22.4	0	8.1	absence	absence	presence	45.3	63.2682
men	62	173	56	18.7	1	10.1	absence	absence	absence	36.5	54.0741
men	62	167	61.6	22.1	1	10.5	absence	absence	absence	46.7	54.8444
men	62	165.6	71.6	26.1	6	6.5	absence	absence	absence	35.8	50.9971
men	62	174	85.2	28.1	4	7.4	absence	absence	absence	24.4	40.264
men	62	165.7	70.2	25.6	11	8	presence	absence	absence	73.5	69.209
men	62	171	82	28	9	8.7	absence	absence	absence	37.5	45.7317
men	62	155	58.6	24.4	11	9.7	absence	absence	presence	38	64.9018
men	62	182.6	119	35.7	3	13.1	absence	absence	absence	31.8	56.7857
men	62	160	59.2	23.1	2	13	absence	presence	absence	45	73.052
men	62	165	67.5	24.8	12	6.6	absence	presence	absence	43.8	73.9865
men	62	166.8	106.2	38.2	15	8.1	absence	presence	absence	27.9	23.4454
men	63	171	65.9	22.5	0	10.2	absence	absence	absence	33.5	49.483
men	63	173	76.6	25.6	8	11.6	absence	absence	absence	59.4	101.365
men	63	166	56	20.3	3	13.1	presence	absence	absence	44.6	74.0864
men	63	155	49.2	20.5	3	16.1	absence	absence	absence	37.3	58.0997
men	63	157	58.6	23.8	6	7.1	absence	absence	presence	60.1	81.5468
men	63	160	60.2	23.5	11	7.2	presence	absence	presence	44.4	58.4211
men	63	165	73.7	27.1	14	7.3	presence	absence	absence	59.5	76.4781
men	63	166.5	76	27.4	5	7.3	absence	absence	presence	42.1	72.5862
men	63	165	69.7	25.6	1	8	absence	absence	presence	30.3	49.4775
men	63	162.5	63.8	24.1	13	9.1	absence	absence	absence	44.7	64.132
men	63	169	62.9	22	5	10.2	absence	absence	presence	48.7	76.3922
men	63	159.8	62.9	24.6	10	10.2	absence	absence	presence	33.1	50.2276
men	63	160	70.4	27.5	18	10.8	absence	absence	absence	43.2	68.6804
men	63	160	56.3	22	5	11	absence	absence	absence	26.4	41.9714
men	63	177.5	77.8	24.7	17	7.3	absence	absence	absence	39.9	56.6761
men	63	160.8	61.2	23.7	10	7.7	absence	absence	absence	26.4	46.8916
men	63	160.1	67.7	26.4	2	5.7	absence	presence	absence	44.6	58.2245
men	63	159.3	64.2	25.3	9	7.3	absence	presence	absence	18.5	33.0357
men	63	162	58	22.1	2	7.6	presence	presence	absence	17.9	36.3821
men	64	165.4	62.4	22.8	9	6.3	absence	absence	absence	35	56.1347
men	64	162	65.4	24.9	1	6.3	absence	absence	absence	51.7	79.052
men	64	160.7	60.6	23.5	0	6.4	absence	absence	absence	47.4	78.2178
men	64	168.5	58.3	20.5	15	6.5	absence	absence	presence	41.2	70.6689
men	64	161.9	62.3	23.7	4	6.5	absence	absence	presence	21.4	34.3775
men	64	161.5	65.5	25.1	5	6.9	absence	absence	presence	39.6	60.458
men	64	175	64	20.9	7	7.2	absence	absence	absence	34.1	51.4717
men	64	167.5	56.9	20.3	5	12.9	absence	absence	presence	39.6	66
men	64	167.2	66.3	23.7	8	6.9	absence	absence	presence	31.4	48.0858
men	64	164	60	22.3	0	7.1	absence	absence	presence	35.9	56.0938
men	64	165	72.8	26.7	10	7.3	absence	absence	absence	51.4	81.717
men	64	175.2	70.5	23	7	7.6	absence	absence	presence	43.5	59.7527
men	64	175.1	85.8	28	2	7.6	absence	absence	presence	50.1	71.0638
men	64	159.3	87.6	34.5	15	8.3	presence	absence	absence	31.8	37.0629
men	64	164.3	62.8	23.3	1	8.4	absence	absence	absence	40.5	67.5
men	64	168	63.7	22.6	1	8.6	absence	absence	absence	55.1	86.296
men	64	161.2	56.8	21.9	18	8.9	absence	absence	presence	35.8	40.8676
men	64	158.5	57.5	22.9	9	9	absence	absence	presence	28.9	46.0191
men	64	160	61.4	24	2	9.3	absence	absence	absence	26.4	41.4768
men	64	156	68.6	28.2	10	10.7	absence	absence	presence	27.6	44.878
men	64	169	61.6	21.6	11	12.4	absence	absence	presence	25.5	44.8944
men	64	165.7	63.9	23.3	3	8.2	absence	absence	absence	49	85.2174
men	64	166.7	65.3	23.5	0	7.2	absence	presence	absence	28.9	47.0684
men	64	156	62.9	25.8	0	7.3	presence	presence	absence	34.2	47.5661
men	64	161	71.9	27.7	24	9.4	presence	presence	absence	39.9	58.1633
men	64	163	58	21.8	1	11.2	absence	presence	absence	59.8	103.103
men	64	159	60	23.7	13	7.6	presence	presence	presence	18.3	29.7078
men	64	157.5	61.5	24.8	14	8.7	absence	presence	presence	40.6	71.3533
men	65	173	75	25.1	0	6.9	absence	absence	absence	34	45.3333
men	65	168	64.3	22.8	6	9.1	absence	absence	absence	36.9	60.1958
men	65	158.8	54.9	21.8	5	11.9	absence	absence	absence	26.4	52.5896
men	65	173	61.3	20.5	20	6.9	absence	absence	presence	45.6	67.7563
men	65	159.7	67.3	26.4	11	8.1	absence	absence	absence	35	54.6875
men	65	161	64	24.7	4	8.3	absence	absence	presence	38.7	63.6513
men	65	159.5	74.8	29.4	8	9	absence	absence	absence	38	59.0062
men	65	169.3	66.5	23.2	2	9.1	absence	absence	presence	31.7	45.942
men	65	167.6	75	26.7	4	9.8	absence	absence	presence	26.8	35.8289
men	65	167.1	56.6	20.3	4	13.6	absence	absence	absence	45.5	70.8171
men	65	163.5	60.8	22.7	16	8.4	presence	presence	absence	47.6	71.579
men	65	165	69	25.3	0	9	absence	presence	absence	63.3	84.4
men	65	154.2	50.2	21.1	13	7	absence	presence	absence	32.7	59.5628
men	65	165.5	64.4	23.5	22	8.8	absence	presence	absence	24.6	43.4629
men	66	172	71.2	24.1	2	6.8	absence	absence	presence	43.7	67.8571
men	66	158	44	17.6	0	13.4	absence	absence	presence	46	64.6067
men	66	164	64.4	23.9	0	6.4	absence	absence	absence	37	66.4273
men	66	171	55.7	19	3	6.8	absence	absence	presence	36.6	60.0985
men	66	167	60.9	21.8	24	6.9	absence	absence	presence	30.4	45.9562
men	66	166.5	71.7	25.9	7	7.4	absence	absence	absence	32.3	45.0488
men	66	166	74	26.9	3	7.7	absence	absence	presence	41.5	56.0811
men	66	168.8	67.1	23.5	20	7.9	absence	absence	presence	27.2	40.5365
men	66	170	60	20.8	9	8.1	absence	absence	absence	39.9	66.5
men	66	170	75.9	26.3	6	8.6	absence	absence	presence	67.9	89.4598
men	66	162	48.9	18.6	3	8.7	absence	absence	absence	38.4	78.5276
men	66	158	67.9	27.2	0	9.1	absence	absence	absence	33	53.6585
men	66	167.5	58.8	21	1	10.3	absence	absence	absence	63.4	93.3726
men	66	167.4	58.3	20.8	0	11.9	absence	absence	presence	35.2	57.9901
men	66	155.2	66.2	27.5	8	7.1	absence	absence	absence	26.5	45.068
men	66	157	60.7	24.6	20	10	absence	absence	absence	19	39.4191
men	66	164.8	59.9	22.1	2	11.5	presence	absence	absence	20.6	34.3907
men	66	154.7	61.5	25.7	10	8.7	absence	presence	presence	34	58.319
men	66	155.5	48.2	19.9	5	10.5	absence	presence	absence	39.9	90.6818
men	67	155	51	21.2	1	11.9	absence	absence	absence	48.2	65.4003
men	67	178.8	73.7	23.1	7	6.2	absence	absence	presence	22.5	43.6893
men	67	166.5	74.1	26.7	10	9.5	absence	absence	presence	36	55.6414
men	67	159.2	50	19.7	14	10.3	absence	absence	absence	39.8	53.7112
men	67	157	50.5	20.5	0	9.5	absence	absence	absence	21.1	41.7822
men	67	165	65	23.9	7	11.8	absence	absence	presence	23	46
men	67	162	51.5	19.6	1	7.9	absence	presence	absence	52.5	80.7692
men	67	163.1	64.7	24.3	13	8.5	absence	presence	absence	30	58.8235
men	68	175	66.4	21.7	1	5.9	absence	absence	absence	37.4	56.3253
men	68	175.2	69.4	22.6	1	5.9	absence	absence	presence	56	80.6916
men	68	170	71.5	24.7	9	6.7	absence	absence	absence	36.2	50.6648
men	68	171.5	63.2	21.5	1	7.1	absence	absence	absence	38.9	62.7419
men	68	169	59.3	20.8	3	8.5	absence	absence	absence	30.9	50.9901
men	68	170	66	22.8	11	13	absence	absence	absence	35.2	55.6962
men	68	163.5	60.6	22.7	8	7	absence	absence	absence	30.4	51.9658
men	68	163	58.5	22	20	7.4	absence	absence	absence	32	53.9629
men	68	173	82	27.4	12	8.8	presence	absence	absence	32.3	39.8274
men	68	168	62	22	6	9	presence	absence	absence	34.7	42.3171
men	68	165	72.3	26.6	0	9.2	absence	absence	absence	43.3	69.8387
men	68	165.5	62	22.6	2	7	absence	presence	presence	44.8	61.964
men	68	167	81.1	29.1	0	8.7	absence	presence	absence	32.6	52.5806
men	68	160	62	24.2	0	11.7	absence	presence	absence	33	50
men	69	172	62	21	10	8.3	presence	absence	absence	27.4	44.6982
men	69	176	68	22	5	6.4	absence	absence	presence	41	60.2941
men	69	155.4	54.5	22.5	3	8.2	absence	absence	absence	31.9	48.2602
men	69	160.7	74.6	28.9	1	10	absence	absence	absence	17.2	26.4615
men	69	167	46.9	16.8	5	10.5	absence	absence	absence	35	64.2792
men	69	170	66.1	22.9	16	6.7	presence	presence	absence	30	48.3871
men	69	161	61.3	23.6	17	6.2	absence	presence	presence	30.7	41.1528
men	69	166.5	65	23.4	20	8	presence	presence	absence	16.2	34.5416
men	70	172	62.6	21.2	4	6.3	absence	absence	presence	38.7	67.3043
men	70	168	69.4	24.6	2	6.7	absence	absence	absence	39	62.3003
men	70	165	55.1	20.2	17	6.9	absence	absence	presence	39.8	54.0761
men	70	163	57.5	21.6	6	6	absence	absence	presence	39.7	76.938
men	70	174	73.6	24.3	6	6.4	absence	absence	presence	41.5	59.7983
men	70	161.5	51.6	19.8	14	6.6	absence	absence	presence	39.2	71.1434
men	70	163	64.4	24.2	11	7.3	absence	absence	absence	29.7	46.118
men	70	166.8	70	25.2	10	9.6	absence	absence	presence	29.9	36.3747
men	70	167	62.2	22.3	6	10.5	absence	absence	absence	23.3	37.5806
men	70	163.1	82.2	30.9	8	7.7	absence	presence	absence	27.7	39.5714
men	70	162	62	23.6	30	8.6	presence	presence	presence	29.8	47.91
men	70	166	70	25.4	12	10.7	absence	presence	presence	45.2	64.5714
men	71	159	60	23.7	30	6.3	absence	absence	absence	25.6	42.6667
men	71	165	59.3	21.8	0	6.6	absence	absence	presence	51.2	86.3406
men	71	164.1	56.7	21.1	15	7.1	presence	absence	presence	20.2	37.757
men	71	160	53.5	20.9	10	6.6	presence	absence	absence	40	78.7402
men	71	164	50.8	18.9	7	6.6	absence	absence	presence	36.2	57.4147
men	71	157.8	63.1	25.3	6	7	absence	absence	absence	20.9	36.8607
men	71	159	64.3	25.4	10	7.2	absence	absence	presence	21	32.6594
men	71	160	65.7	25.6	9	7.3	absence	absence	absence	42.7	65.0419
men	71	159.8	74	29	21	9.4	absence	absence	absence	21.9	39.1071
men	71	162.5	68.1	25.8	5	9.5	absence	absence	absence	28.4	41.8879
men	71	170.6	80.8	27.8	1	12.5	absence	absence	absence	34.3	50.7396
men	71	168	67.8	24	22	8	presence	presence	presence	59.8	80.8108
men	71	158.8	56	22.2	20	7.5	absence	presence	presence	42.8	62.8488
men	71	171	67.6	23.1	11	8.3	absence	presence	presence	41.5	51.3614
men	72	176.6	74.9	24	19	9	absence	absence	absence	34.7	64.2593
men	72	170	70.6	24.4	33	8.7	absence	absence	absence	33.1	43.0429
men	72	160	54	21.1	6	5.9	absence	absence	absence	39.1	58.3582
men	72	163	67	25.2	4	7	absence	absence	absence	35.7	50.495
men	72	166.8	70.7	25.4	3	7.1	absence	absence	absence	38.6	55.3009
men	72	153.7	57.4	24.3	5	7.6	absence	absence	presence	28.2	49.1289
men	72	159	54.5	21.5	8	7.8	presence	absence	absence	44.9	82.461
men	72	160	59	23	14	7.8	presence	absence	absence	34.5	58.4746
men	72	166	67.9	24.6	4	8.5	absence	absence	absence	37.7	55.5637
men	72	163	83	31.2	8	8.8	absence	absence	presence	46.9	66.4306
men	72	167	76.9	27.6	12	6	presence	presence	presence	49.6	59.759
men	72	160.5	69.8	27.1	9	7.4	absence	presence	absence	35.4	47.263
men	72	171	81.3	27.8	27	10	absence	presence	presence	31.3	38.4994
men	73	159	63	24.9	12	5.8	absence	absence	presence	30.7	48.7302
men	73	168.4	60.4	21.3	9	7.7	absence	absence	presence	20.1	34.359
men	73	169.1	58.5	20.5	4	5.8	absence	absence	presence	44.3	62.3066
men	73	169.8	71.1	24.7	8	6.7	absence	absence	absence	30.8	52.027
men	73	159	59.2	23.4	2	7.1	absence	absence	presence	29.1	48.1788
men	73	159	65	25.7	5	8.2	absence	absence	absence	15.7	24.1538
men	73	168	68.3	24.2	30	10.6	absence	absence	presence	24	39.8671
men	73	165	65	23.9	1	9.4	absence	absence	absence	24.4	37.5385
men	73	157.5	60.6	24.4	10	10.2	presence	presence	presence	13.6	24.9541
men	73	158	60.2	24.1	10	8.8	absence	presence	absence	21.4	35.3135
men	73	159	54.5	21.6	33	9.9	absence	presence	absence	45.6	64.0449
men	73	165	71.2	26.2	10	10.2	absence	presence	absence	39.9	58.4187
men	74	163	69.1	26	14	7.3	absence	absence	presence	39.9	69.7552
men	74	159.5	65.4	25.7	13	7.3	absence	absence	presence	24	40.201
men	74	166	57.8	21	4	12.1	absence	absence	presence	29.2	46.9076
men	74	154.4	47.6	19.9	15	12.7	absence	absence	absence	48	65.9794
men	74	159	57.2	22.6	23	6.5	absence	absence	presence	42.1	60.9262
men	74	153	59.7	25.5	31	6.8	absence	absence	presence	40.4	61.7737
men	74	158.9	62.3	24.7	1	6.9	absence	absence	presence	34.2	59.5819
men	74	161	60.5	23.3	20	10.3	presence	absence	presence	35.6	64.7273
men	74	156	55	22.6	8	7.8	absence	absence	presence	32.5	53.719
men	74	166.2	57.4	20.8	34	7.6	absence	presence	presence	26.9	46.5398
men	74	166.6	72.8	26.2	9	7.1	presence	presence	absence	13	27.3396
men	75	170.6	66.3	22.8	0	6.2	absence	absence	absence	39.6	59.7285
men	75	160	60	23.4	8	6.2	presence	absence	presence	36	60
men	75	162.5	60.5	22.9	15	6.8	presence	absence	presence	39.5	65.2892
men	75	160	56	21.9	12	6.8	presence	absence	presence	30.1	53.75
men	75	178.2	63.4	20	0	9.5	absence	absence	absence	22.9	26.0227
men	75	165	66.9	24.6	4	10.9	absence	absence	absence	21	33.123
men	75	172	88	29.7	15	8.9	presence	presence	absence	12.7	18.9836
men	76	163	60.5	22.8	1	6.3	absence	absence	presence	17.2	23.2432
men	76	163	59	22.2	20	7	absence	absence	presence	43.6	72.1257
men	76	150	58.5	26	10	9.2	absence	absence	presence	31	56.4663
men	76	155	58.4	24.3	6	8	absence	absence	absence	43	72.8814
men	76	142.5	50.9	25.1	6	8.1	presence	absence	absence	27.3	45.379
men	76	170	70.4	24.4	2	9	absence	absence	absence	25.5	36.4286
men	76	166	70.6	25.6	14	10.6	absence	absence	presence	13.5	23.1164
men	76	157.5	62.2	25.1	10	8.6	absence	absence	absence	15.6	30.6483
men	76	165	64	23.5	17	10.2	absence	absence	presence	30.5	49.0354
men	76	172	74	25	11	5.8	absence	presence	absence	32.1	45.5966
men	76	164.4	60.2	22.3	28	7.3	absence	presence	presence	24.8	42.3932
men	76	165	70	25.7	10	7.6	absence	presence	presence	37	57.8125
men	76	161.2	52.5	20.2	1	10.8	presence	presence	absence	31.5	44.6176
men	76	157.1	54.9	22.2	18	6.4	presence	presence	presence	17.9	34.0952
men	77	162	52	19.8	0	5.1	absence	absence	absence	33.8	65
men	77	154	49.9	21	6	6.5	absence	absence	presence	25.6	60.9524
men	77	156.8	52.3	21.3	1	13.3	absence	absence	presence	27.7	55.511
men	77	155	42	17.5	4	6.1	absence	absence	presence	25.1	40.5493
men	77	165	54	19.8	6	6.6	presence	absence	presence	34.3	63.5185
men	77	161	63.9	24.7	12	9.2	absence	absence	absence	33.2	58.348
men	77	165.2	62.5	22.9	0	12.7	absence	absence	presence	27.9	50.9124
men	77	157	55	22.3	0	14.5	absence	absence	absence	36.1	56.4945
men	77	159.8	61.9	24.2	4	6.6	absence	presence	presence	32.9	72.7876
men	77	151	45.2	19.8	30	9.4	presence	presence	presence	20.6	32.96
men	77	154.7	54.8	22.9	22	8.6	absence	presence	absence	30.8	58.891
men	77	164	56.9	21.2	10	7.2	absence	presence	absence	18.6	33.8182
men	78	157.2	42.3	17.1	5	6.4	absence	absence	absence	24.7	43.8721
men	78	156	49.3	20.3	25	7.3	absence	absence	presence	14.2	33.5697
men	78	159.9	66	25.8	5	9.2	absence	absence	presence	29.4	48.5149
men	78	155.9	56.3	23.2	8	6.2	presence	absence	presence	17.5	35.497
men	78	156	60.6	24.9	16	6.9	presence	absence	presence	25	46.9043
men	78	158.6	53.3	21.2	45	8	absence	presence	absence	31.5	47.7273
men	79	165.3	79.4	29.1	0	6.7	absence	absence	absence	44.2	55.6675
men	79	158.3	73.3	29.3	18	6.8	absence	absence	absence	46.6	73.9683
men	79	171	59.7	20.4	13	7.5	absence	absence	absence	23.6	32.1965
men	79	163.2	63	23.7	22	6.8	presence	presence	presence	26.7	44.7236
men	79	154.8	46.6	19.4	20	10	absence	presence	absence	21	45.0644
men	79	171.2	67.5	23	0	15.9	absence	presence	presence	25.5	37.7778
men	80	161	68.3	26.4	3	6.5	absence	absence	presence	29.2	42.74
men	80	165	58	21.3	23	10.7	absence	absence	presence	17.7	30.5172
men	81	157.6	55.5	22.3	6	6.4	absence	absence	presence	26	44.6735
men	81	164.7	58.2	21.5	5	5.9	absence	absence	absence	26.2	47.2072
men	81	165	53.3	19.6	18	8.1	absence	absence	presence	11.7	20.0686
men	81	156.8	58.3	23.7	18	7.4	absence	presence	absence	17.9	33.5835
men	82	155.4	60.2	24.9	20	6	absence	absence	absence	15.5	25.7475
women	31	165.5	104.6	38.2	1	6	absence	absence	presence	57.5	54.9713
women	31	152	48.1	20.8	3	6.9	absence	absence	absence	32.2	66.9439
women	31	160	98.1	38.3	1	10.1	absence	absence	absence	25.5	25.9939
women	32	153	76.6	32.7	0	11	absence	absence	absence	41.5	54.1775
women	33	140	56.5	28.8	6	11	presence	absence	absence	26.5	46.9027
women	34	157.7	84.6	34	0	7	absence	absence	absence	31.3	36.9976
women	34	153.6	58.2	24.7	3	9.5	absence	absence	absence	31.9	54.811
women	35	163.5	68.5	25.6	0	9.5	absence	absence	absence	29.6	43.2117
women	36	163	69	26	5	8.5	absence	absence	absence	11.3	14.9867
women	36	172	75.4	25.5	15	8.4	absence	absence	absence	33.5	48.5507
women	37	166	73.2	26.6	12	8.2	absence	absence	absence	25.4	34.6995
women	38	152	75.7	32.8	0	12.7	absence	absence	absence	23.5	27.5498
women	38	153	85.3	36.4	5	7.4	absence	absence	presence	36.7	50.5858
women	38	158	72.6	29.1	0	8.8	absence	absence	absence	28.7	37.9128
women	39	161	49	18.9	0	9.9	absence	absence	absence	41.4	60
women	39	165	69	25.3	3	8.2	absence	absence	absence	18.2	17.7995
women	39	161.3	89.3	34.3	0	9.6	absence	absence	absence	42.7	47.8163
women	39	153	102.3	43.7	2	9	absence	absence	absence	30.6	62.449
women	39	154	70.1	29.6	1	11.1	absence	absence	absence	27.3	38.9444
women	40	161.7	58.1	22.2	8	13.3	absence	absence	absence	33.6	52.5
women	40	155	47.6	19.8	10	13.7	absence	absence	presence	32.4	55.7659
women	40	161	64	24.7	1	10.6	absence	presence	absence	22.9	48.1092
women	40	160	42.9	16.8	7	14.1	presence	presence	absence	7.4	17.2494
women	41	167.5	81	28.9	0	7.6	absence	absence	absence	15.1	18.642
women	41	165	68	25	1	9.9	absence	absence	presence	39.7	44.1111
women	41	163.7	80.1	29.9	8	8.3	absence	absence	absence	35.1	43.8202
women	41	154	48	20.2	7	9.9	absence	absence	absence	34.2	33.5294
women	41	158	90	36.1	10	7.7	absence	presence	absence	24.2	35.5882
women	41	168	102	36.1	10	8.9	presence	presence	absence	46.3	96.4583
women	42	152.4	50.4	21.7	0	12.9	absence	absence	absence	29	45.7413
women	42	160.5	63.4	24.6	15	8.1	presence	absence	absence	15.7	25.2818
women	42	152	62.1	26.9	1	10	absence	absence	absence	27.9	34.7015
women	42	162.4	80.4	30.5	4	11.3	absence	absence	absence	28.2	56.0079
women	43	156.6	55.5	22.6	3	9.5	absence	absence	absence	30.7	55.3153
women	43	152	60.9	26.4	2	13	absence	absence	absence	25.5	35.9155
women	43	148	71	32.4	6	9.8	absence	absence	absence	9.2	15.1067
women	44	165	102.2	37.5	4	7.5	absence	absence	absence	43.7	42.7593
women	44	166	92.2	33.5	0	10.2	absence	absence	absence	56.3	61.0629
women	44	154.3	79.6	33.4	4	11.3	absence	presence	absence	21.9	27.5126
women	45	152	101.3	43.8	4	7.2	presence	presence	absence	21.3	21.0267
women	46	162	58.2	22.2	8	7	absence	absence	absence	27.5	47.2509
women	46	154.3	71.8	30.2	3	7.5	absence	absence	absence	53.9	69.5484
women	46	162	82	31.2	15	9.1	absence	absence	absence	30	41.7827
women	46	152	90.1	39	2	9.5	absence	absence	absence	25.8	31.4634
women	46	161.2	88.1	33.9	0	14.7	absence	absence	absence	28.3	31.4095
women	46	177.6	84	26.6	2	11.5	presence	presence	absence	47.5	56.5476
women	46	157.8	87.8	35.3	6	12.3	absence	presence	absence	15.7	17.8816
women	46	166	64.2	23.3	3	14.5	absence	presence	presence	16.6	25.8769
women	46	154.8	77.5	32.3	3	7	presence	presence	absence	25.6	29.0579
women	47	152.9	60	25.7	2	14	absence	absence	absence	33.1	55.1667
women	47	167	84	30.1	0	15.7	absence	absence	absence	33.7	40.1191
women	48	153.9	37.5	15.8	1	9.8	absence	absence	absence	25.6	32.8205
women	48	150	52.5	23.3	0	12.5	absence	absence	absence	23.2	61.8667
women	48	151	78	34.2	3	7	absence	presence	absence	24.2	46.0952
women	49	154	60.6	25.5	3	7.6	absence	absence	absence	21.8	36.0033
women	50	146.2	48	22.5	6	11.6	absence	absence	absence	21.2	44.1667
women	51	157	52.2	21.2	7	16.9	absence	absence	absence	34	50.7463
women	51	151.7	90	39.1	15	8	absence	absence	absence	26.3	28.7432
women	51	162	71.6	27.3	8	12.5	absence	absence	absence	49.3	54.7778
women	51	154.6	67	28	5	6.1	presence	absence	presence	25.7	50.1953
women	51	161	91.5	35.3	9	7.4	absence	absence	absence	37.3	54.8529
women	51	159.1	51.2	20.2	0	8.9	absence	absence	presence	32.4	42.9708
women	51	161.6	58.8	22.5	12	11.6	absence	absence	absence	30.3	51.5306
women	51	156.5	75.4	30.8	20	10.3	absence	presence	absence	30.6	42.7374
women	51	161	68	26.2	0	9.1	absence	presence	absence	35.3	67.6245
women	52	150.3	73.4	32.5	6	8	absence	absence	presence	26	35.4223
women	52	161	67.9	26.2	4	10.7	absence	absence	absence	32.6	48.0118
women	52	159.8	81.7	32	0	11.3	absence	absence	absence	35.8	43.8188
women	52	148	53	24.2	1	12.2	absence	presence	absence	26.1	49.2453
women	53	148	59.8	27.3	0	7.6	absence	absence	presence	36.5	68.097
women	53	155.1	73.1	30.4	8	8.4	absence	absence	absence	30.6	51.1706
women	53	164	64.2	23.9	0	11.6	absence	absence	presence	23.1	31.6005
women	53	151.7	53.6	23.3	27	6.6	presence	absence	presence	31.5	34.5016
women	53	167.2	91.3	32.7	7	9.9	absence	absence	absence	25.6	39.8754
women	54	157	61	24.7	1	6.5	absence	absence	absence	22.6	37.0796
women	54	159.3	57.4	22.6	2	10.3	absence	absence	presence	36.2	58.3871
women	54	160	62	24.2	3	8.4	absence	absence	absence	25.4	31.75
women	54	157	61.5	24.9	14	11.3	absence	absence	absence	31.5	54.878
women	54	150.6	53.2	23.5	0	13.2	absence	absence	absence	39.4	64.1172
women	54	159	80	31.6	34	10.1	presence	presence	absence	33.4	62.782
women	55	158.5	67.4	26.8	0	6.3	absence	absence	absence	22.1	32.7893
women	55	154	82.3	34.7	14	11.4	absence	absence	absence	26.2	48.5185
women	55	150.8	51.8	22.8	15	12.4	absence	absence	absence	15.3	18.5905
women	55	146	54	25.3	12	9	absence	absence	absence	18.4	30.2632
women	55	157.7	60.8	24.4	0	11.8	absence	absence	absence	25.3	48.8417
women	55	157.5	74.2	29.9	1	13.6	absence	presence	absence	22.5	30.3235
women	56	143	50	24.5	1	8.9	absence	absence	absence	23.4	46.8
women	56	156.5	65	26.5	3	8.9	absence	absence	absence	51.1	78.6154
women	56	151	60.5	26.5	0	10.7	absence	absence	absence	28.5	47.1074
women	56	148.4	45.8	20.8	6	11.7	absence	absence	presence	24.2	43.6036
women	56	152	55.5	24	0	10.8	absence	absence	absence	22.1	48.2533
women	56	156	56.6	23.3	0	14.1	absence	absence	absence	16.2	28.6219
women	57	156.7	52.2	21.2	3	6.5	absence	absence	presence	53.2	74.7191
women	57	167.2	60.9	21.8	4	7	absence	absence	absence	22.1	42.3778
women	57	166.1	71.2	25.8	0	6.2	absence	absence	absence	24.1	30.2384
women	57	149.5	56.1	25.1	4	8.4	absence	absence	absence	29.8	48.9327
women	57	160.4	61.8	24	2	9.4	absence	absence	presence	21.9	42.6901
women	57	152	56.4	24.4	4	9.9	absence	absence	presence	28.4	38.0187
women	57	153.7	56.3	23.8	15	11.5	absence	absence	absence	25.1	37.5749
women	57	156.9	75.1	30.5	0	13.8	absence	absence	absence	21.1	37.6114
women	57	156.5	51.3	20.9	8	7.2	absence	absence	absence	39.8	62.9747
women	57	162	74.7	28.5	5	8	absence	absence	absence	38.8	62.7832
women	57	153	66.8	28.5	14	8	presence	absence	absence	24.6	43.617
women	57	169.1	63.2	22.1	0	9.1	absence	absence	absence	27.1	48.135
women	57	147.2	64	29.5	10	13.7	absence	absence	presence	23.8	30.4738
women	57	148	61.4	28	10	12.3	absence	presence	absence	20.7	33.7134
women	57	148	79.7	36.4	8	6.8	absence	presence	absence	30.7	47.9688
women	57	166.3	78.1	28.2	21	11.7	presence	presence	absence	26.9	35.8189
women	58	158	57.3	23	4	6.4	absence	absence	presence	20.5	35.7766
women	58	151	61.8	27.1	6	6.8	absence	absence	presence	29.4	47.5728
women	58	147.3	62	28.6	4	7.5	presence	absence	absence	17.3	27.9032
women	58	151	72.4	31.8	0	8.6	absence	absence	absence	21.7	28.628
women	58	153.5	58	24.6	10	8.8	absence	absence	absence	7.6	10.4972
women	58	158	57.2	22.9	0	11	absence	absence	absence	13.9	23.9655
women	58	166	75.8	27.5	26	8.5	presence	presence	absence	19.1	33.3916
women	59	154.5	76	31.8	6	6.2	absence	absence	absence	29.1	38.2895
women	59	151	38	16.7	16	6.5	presence	absence	absence	19.6	51.5789
women	59	153	64	27.3	5	8.6	absence	absence	absence	31.8	68.3871
women	59	154	48.7	20.5	0	10.7	absence	absence	absence	22.9	39.7569
women	59	155	46.5	19.4	4	7.4	presence	absence	absence	27	42.1875
women	59	151.8	57.6	25	1	8.4	presence	absence	absence	22.7	46.6119
women	59	151	49.3	21.6	1	11.4	absence	absence	absence	20.5	41.5821
women	59	153.5	49.4	21	1	13.7	absence	absence	absence	21.7	43.9271
women	59	146	49	23	0	14.4	absence	presence	absence	19.5	39.7959
women	60	158.1	62.9	25.2	3	8.4	absence	absence	presence	14.8	31.828
women	60	155.8	62.9	25.9	0	9.5	absence	absence	absence	26.1	38.6095
women	60	147	45.9	21.2	5	10.7	absence	absence	absence	23.3	39.7611
women	60	152	67.6	29.3	2	6.3	absence	absence	presence	15.5	25.8765
women	60	154.9	58.6	24.4	10	7.7	absence	absence	absence	35.4	73.2919
women	60	153	59.9	25.6	20	7.9	absence	absence	absence	44.6	70.9062
women	60	151	46	20.2	8	9.1	absence	absence	presence	16.6	29.1228
women	60	149.5	54.5	24.4	3	13.2	absence	absence	absence	28.6	62.1739
women	60	150	48.3	21.5	2	8	absence	absence	presence	29.5	46.8998
women	60	151	57	25	2	8.6	presence	absence	absence	25.8	45.0262
women	60	152.7	53.2	22.8	0	12.5	absence	absence	absence	22.8	49.6732
women	60	156.1	46.5	19.1	10	6.3	presence	presence	absence	13.9	26.1278
women	60	154	40.1	16.9	0	14.1	absence	presence	absence	29.5	54.1284
women	60	147.2	57.3	26.4	3	10.6	presence	presence	absence	14.7	36.6584
women	61	158	53.9	21.6	6	6.8	absence	absence	presence	35.5	62.1716
women	61	162	54.2	20.7	1	7.5	presence	absence	absence	20.8	38.59
women	61	151	55.3	24.3	18	8.5	presence	absence	absence	26.6	49.0775
women	61	155	52	21.6	2	11.7	absence	absence	absence	34.4	50.2924
women	61	150.3	55.2	24.4	8	9.8	absence	absence	absence	16	28.9331
women	61	150	57.1	25.4	0	6.6	absence	absence	absence	31.9	61.3462
women	61	162	52	19.8	3	9.5	absence	absence	presence	31.9	57.7899
women	61	145	42.3	20.1	0	10.2	absence	absence	absence	27.9	65.9574
women	61	152.4	53.9	23.2	4	10.3	absence	absence	absence	22.9	42.5255
women	61	154	43.3	18.3	5	11.7	presence	absence	absence	27.8	53.4615
women	61	160.1	68.4	26.7	14	8	presence	presence	presence	12.7	29.3303
women	62	152	50.8	22	2	5.7	absence	absence	presence	16.2	31.8898
women	62	151.5	53	23.1	15	7	absence	absence	presence	30.6	59.0734
women	62	154	57	24	7	8	absence	absence	presence	41.2	77.7358
women	62	153	51.8	22.1	4	6.9	absence	absence	absence	16.5	32.6087
women	62	160	51.8	20.2	20	10.2	absence	absence	presence	25.7	43.5593
women	62	160	50.6	19.8	3	12.9	absence	absence	absence	27.5	41.8569
women	62	149.2	65.7	29.5	19	7.8	absence	absence	absence	32	62.5
women	62	158.5	61	24.3	12	8.2	absence	absence	presence	16.2	28.4211
women	62	149.3	47	21.1	0	10.3	absence	absence	presence	18.4	35.8674
women	62	160	59	23	10	7.5	presence	absence	presence	38	62.2951
women	62	160	45.5	17.8	2	12.1	absence	absence	absence	34	50.5201
women	62	161	67.3	26	25	8.8	absence	presence	presence	22.5	43.4363
women	62	144.1	51.3	24.7	16	8.1	presence	presence	presence	35.7	75.9574
women	62	154	51.2	21.6	26	7.9	presence	presence	presence	14.3	31.4286
women	62	156.5	50.6	20.7	10	7.4	presence	presence	absence	18	35.5731
women	63	151	54.6	23.9	9	6.3	absence	absence	presence	27.2	50.3704
women	63	154.4	59.1	24.8	2	7.3	absence	absence	presence	20.3	37.1795
women	63	158	66	26.4	6	8.6	absence	absence	absence	21.2	34.3042
women	63	154	49	20.6	12	10.5	absence	absence	absence	34	70.8333
women	63	160.3	67.6	26.3	2	11.6	absence	absence	absence	25.1	71.7143
women	63	161	66	25.5	8	9.9	presence	absence	presence	38.3	64.8054
women	63	154	54	22.8	2	5.5	absence	absence	absence	15.9	29.3629
women	63	152	48	20.8	5	6.4	absence	absence	presence	35.6	53.9394
women	63	145	54.2	25.8	13	8	presence	absence	absence	22.6	28.392
women	63	144.4	36.8	17.6	3	9	absence	absence	presence	25.5	69.2935
women	63	153.8	52.8	22.3	10	9.7	absence	absence	absence	25.8	48.8636
women	63	167.4	60	21.4	15	9.9	presence	absence	presence	36.5	55.303
women	63	138.5	35	18.2	15	7.3	presence	presence	absence	11.9	19.8333
women	63	153	61.8	26.4	15	6.3	absence	presence	absence	40.7	83.1461
women	63	163	79.6	30	0	8.8	presence	presence	absence	31.1	46.0059
women	63	163.1	68.5	25.8	6	13.8	absence	presence	absence	15.8	23.0657
women	64	152.5	59.2	25.4	1	5.9	absence	absence	absence	13.4	22.6543
women	64	153.5	57.4	24.3	0	7.4	absence	absence	absence	30.7	44.3642
women	64	162.4	69.2	26.2	7	5.9	absence	absence	presence	32.3	68.7966
women	64	146	55.3	25.9	39	6.1	absence	absence	absence	13.4	24.2315
women	64	139.5	40.5	20.8	8	12.2	presence	absence	absence	30	38.3632
women	64	149	47	21.1	5	6	absence	absence	presence	28.4	34.8894
women	64	156	78.2	32.1	4	6.4	absence	absence	absence	34	66.6667
women	64	161	81.4	31.4	3	6.6	absence	absence	absence	36	67.2897
women	64	158	51	20.4	13	6.6	presence	absence	presence	34.7	61.4159
women	64	154	53.5	22.6	6	6.8	absence	absence	presence	28.9	61.8844
women	64	150	46.7	20.8	3	6.9	absence	absence	absence	20	30.0752
women	64	160.5	66.5	25.8	3	7.2	absence	absence	absence	27.5	47.9512
women	64	155	61	25.4	5	7.9	absence	absence	absence	22.9	37.541
women	64	148.8	61.9	28	5	8.2	presence	absence	absence	31.4	50.727
women	64	158	63	25.2	16	8.4	absence	absence	absence	27.3	43.3333
women	64	147.8	60	27.5	10	8.8	absence	absence	presence	23.1	38.5
women	64	150.2	47.4	21	0	9.9	absence	absence	absence	34.9	51.2482
women	64	153.5	56.5	24	5	6.8	absence	absence	absence	27.9	58.9229
women	64	148.7	54.8	24.8	10	10	absence	presence	absence	40.3	73.5401
women	64	155.2	68.9	28.6	4	13.4	absence	presence	absence	15.2	37.5309
women	64	151.5	68.1	29.7	9	9.1	presence	presence	presence	24	34.8331
women	65	161.2	56	21.6	0	6.8	absence	absence	absence	28.1	43.2308
women	65	143.2	44.8	21.8	6	7.3	absence	absence	absence	22.4	40
women	65	158.5	57.2	22.8	1	9.9	absence	absence	absence	19.2	28.614
women	65	150.2	59.8	26.5	8	12.3	absence	absence	absence	27.9	45.5882
women	65	147.3	61.2	28.2	1	7	absence	absence	absence	35.7	79.7765
women	65	160	76	29.7	2	8	absence	absence	absence	24.8	37.1814
women	65	149	48.2	21.7	20	8.2	absence	absence	presence	23.8	31.3158
women	65	153.2	54.4	23.2	16	8.2	absence	absence	presence	24.7	51.2448
women	65	151	49.5	21.7	0	8.3	absence	absence	presence	18.5	34.0074
women	65	158	60.5	24.2	20	9.4	absence	absence	absence	27.3	55.1515
women	65	154.6	50.9	21.3	1	9.9	absence	absence	absence	22.8	37.6859
women	65	154	67.1	28.3	16	6.8	absence	absence	absence	39.4	66.2185
women	65	150	66.7	29.6	7	7.4	absence	presence	absence	14.3	25
women	65	154	60.4	25.5	5	14.4	absence	presence	absence	14.2	27.9253
women	65	153	65	27.8	20	6.5	absence	presence	presence	6.8	11.3712
women	65	153.8	59.5	25.2	3	9.5	presence	presence	absence	21.2	35.0993
women	66	144.3	56.4	27.1	1	10.7	absence	absence	presence	12.2	28.6721
women	66	153	42.6	18.2	7	6.3	absence	absence	absence	22.3	47.957
women	66	157.5	46.5	18.7	10	7.1	absence	absence	absence	37.4	48.1338
women	66	157	55.5	22.5	13	7.3	absence	absence	absence	23.8	42.8829
women	66	146.8	54.6	25.3	9	7.9	absence	absence	presence	22.9	41.9414
women	66	157	63.6	25.8	13	8.3	absence	absence	presence	18.6	29.2453
women	66	160	84.6	33	1	11.1	absence	absence	absence	20.4	38.2381
women	66	145	53.4	25.4	14	10.1	absence	absence	absence	13.2	17.0984
women	66	140	36.5	18.6	4	13.2	absence	absence	absence	17.4	28.9037
women	66	165	77.7	28.5	6	7.3	absence	presence	absence	24.8	43.9716
women	66	152.5	60.2	25.9	19	10.6	presence	presence	presence	33	39.0071
women	66	159.5	77.2	30.3	21	10.3	presence	presence	absence	20.7	56.7901
women	67	149	57.5	25.9	0	5.7	absence	absence	absence	30.2	52.5217
women	67	154.5	60.3	25.3	15	8.9	absence	absence	absence	24.2	33.2418
women	67	153	72.8	31.1	0	6.1	absence	absence	absence	20	37.9507
women	67	142	52.7	26.1	3	6.4	absence	absence	absence	32	69.5652
women	67	156	46	18.9	5	6.6	absence	absence	presence	25.1	51.9669
women	67	153.7	48.3	20.4	9	7.2	presence	absence	presence	23.5	53.4091
women	67	143.2	44	21.5	3	8.2	absence	absence	presence	41.7	78.6792
women	67	147	53	24.5	0	8.4	absence	absence	absence	24.9	34.874
women	67	151.4	58	25.3	1	8.8	absence	absence	absence	23.2	40
women	67	152	71.4	30.9	6	8.5	absence	absence	presence	18.4	30.5141
women	67	152.2	56.7	24.5	10	9.9	absence	absence	absence	37.1	65.4899
women	67	151	44.2	19.4	13	10.3	absence	absence	presence	17.5	39.6376
women	68	160.9	56.3	21.7	6	6.5	absence	absence	presence	33.5	59.5027
women	68	151.5	59.6	26	20	8.2	presence	absence	absence	35.7	59.699
women	68	151	51.8	22.7	5	not available	absence	absence	presence	19.3	32.3826
women	68	156.2	45	18.4	28	9.3	presence	absence	presence	26.2	58.2222
women	68	147	59.8	27.7	9	7	absence	absence	presence	23.5	45.3668
women	69	150.7	42.2	18.6	2	6.1	absence	absence	absence	25.4	41.3681
women	69	149	54	24.3	9	7.4	absence	absence	presence	16	37.9147
women	69	145	54.5	25.9	12	6.6	presence	absence	presence	19.6	33.7349
women	69	158	60	24	2	7.5	absence	absence	presence	30	55.0459
women	69	148.1	41	18.7	4	8.7	absence	absence	absence	25.6	47.4074
women	69	154	53	22.3	20	10.1	presence	absence	absence	24.5	40.8333
women	69	163	61.4	23.1	5	5.9	absence	presence	presence	16.6	40.4878
women	69	160	58.1	22.7	18	6.6	absence	presence	presence	16	30.1887
women	69	156	54.3	22.3	4	11.3	absence	presence	presence	27.6	50.8287
women	70	150	51.6	22.9	11	6.7	absence	absence	absence	16.2	42.1875
women	70	151	43	18.9	5	6.4	absence	absence	presence	29.9	69.5349
women	70	145	38.4	18.3	12	6.1	presence	absence	presence	15.9	30.814
women	70	157.8	68	27.3	3	7.3	absence	absence	presence	27.7	40.7353
women	70	153	52.5	22.4	10	8.2	absence	absence	absence	24	54.0541
women	70	153	54.5	23.3	0	12.1	presence	absence	absence	19.2	29.3578
women	70	159	44.4	17.6	8	7.9	presence	absence	presence	23.9	45.5238
women	70	145	44	20.9	10	9.5	presence	absence	absence	19.2	43.6364
women	70	149	54.4	24.5	40	11.1	presence	absence	absence	23.2	42.6863
women	70	148.8	65.4	29.5	12	8.1	presence	presence	presence	20	36.6972
women	71	156.1	50.4	20.7	13	5.9	absence	absence	absence	11.5	22.8401
women	71	156	48.5	19.9	0	13.1	absence	absence	presence	14.7	42
women	71	144	35	16.9	1	6.4	absence	absence	absence	26.1	52.9412
women	71	153	49.3	21.1	4	7	absence	absence	absence	27	52.0231
women	71	154	59	24.9	2	7.2	absence	absence	presence	24.2	41.017
women	71	151.5	51.5	22.4	20	9.8	absence	absence	absence	29.4	57.0874
women	71	144	58.5	28.2	15	11.6	presence	absence	absence	20.7	38.1215
women	71	149	51.9	23.4	9	7	presence	absence	presence	14.9	25.734
women	71	155	47	19.6	15	11.2	absence	absence	presence	29.4	62.5532
women	71	153.2	54.3	23.1	10	11.1	absence	presence	absence	12	20.5128
women	71	147.5	57.9	26.6	1	11.2	absence	presence	absence	22.1	45.567
women	72	151.1	84.9	37.2	1	6.6	absence	absence	absence	15.3	29.5938
women	72	155.2	64.3	26.7	1	6.9	absence	absence	presence	17	20.0354
women	72	155.5	39.3	16.2	0	6.7	absence	absence	presence	22.5	43.1862
women	72	154	51.7	21.8	5	6.2	absence	absence	absence	21	53.5032
women	72	145.9	52.1	24.5	11	6.6	absence	absence	absence	30.8	47.9377
women	72	153	52.8	22.6	11	7	absence	absence	presence	25.2	47.7273
women	72	149	50	22.5	24	8	presence	absence	presence	23.4	38.6777
women	72	158.3	39.9	15.9	11	8.8	presence	absence	presence	23.7	47.4
women	72	154	60.5	25.5	5	7.8	absence	absence	presence	10.6	26.5664
women	72	143	51.1	25	0	11.3	absence	absence	absence	16.4	32.0939
women	72	146	47	22	0	11.4	absence	presence	absence	16.7	35.5319
women	73	155.5	55.6	23	11	8.6	absence	absence	absence	25.7	40.9236
women	73	151	61.8	27.1	6	6.4	absence	absence	presence	30	48.5437
women	73	162	51.8	19.7	13	6.9	presence	absence	absence	13.5	24.3243
women	73	146	44	20.6	16	8.1	absence	absence	presence	17	32.8185
women	73	150	50.5	22.4	23	8.8	presence	absence	absence	20.3	46.1364
women	73	154.7	62.8	26.2	11	6.2	absence	presence	absence	14.1	25.3597
women	73	156	55.5	22.8	6	6.5	presence	presence	presence	32.4	64.1584
women	74	149	54	24.3	10	6.6	absence	absence	presence	31.2	57.7778
women	74	152.6	71.8	30.8	10	7.3	presence	absence	absence	38.4	70.9797
women	74	138	61.2	32.1	15	8.4	absence	absence	presence	38.3	53.3426
women	74	149	53.5	24.1	8	8.6	absence	absence	absence	26.2	54.2443
women	74	158	87	34.9	10	8.7	absence	absence	absence	25.8	42.1569
women	74	162	71.3	27.2	9	9	presence	absence	absence	35.1	65.6075
women	74	149	54.1	24.4	1	6.8	presence	presence	presence	29.7	34.1379
women	74	149.5	48.3	21.6	3	7.9	absence	presence	presence	15.7	22.0196
women	74	147	41.1	19	1	13.7	absence	presence	presence	16.4	39.9027
women	75	153.4	42	17.8	33	7.9	absence	absence	absence	21.4	33.2298
women	75	147.3	64.4	29.7	6	7.1	absence	absence	presence	26.4	62.8571
women	75	151	48	21.1	15	8.5	absence	absence	presence	19.4	40.4167
women	75	141.6	38.2	19.1	25	10.8	absence	absence	absence	8.2	21.466
women	75	165.2	68.8	25.2	2	10.8	absence	absence	presence	29.7	43.2
women	75	156	49.5	20.3	2	13.2	presence	presence	presence	17.5	35.3535
women	76	148.1	58.3	26.6	4	6	absence	absence	presence	26.1	44.7684
women	76	139	50.7	26.2	10	7.1	absence	absence	absence	18.5	33.7591
women	76	153	54	23.1	1	8.9	absence	absence	absence	22.2	33.6364
women	76	153	47	20.1	16	9.3	absence	absence	absence	21.5	44.8852
women	76	152.2	47.9	20.7	3	6.9	presence	absence	presence	7.2	14.2012
women	76	152	66	28.6	12	6.8	presence	presence	absence	15.2	28.1481
women	76	149	48.5	21.8	0	12.6	absence	presence	absence	16.4	34.8936
women	76	154	54.8	23.1	15	6.8	absence	presence	absence	16.6	34.2621
women	77	154.1	46.9	19.8	15	8.8	absence	absence	absence	21.1	44.9893
women	77	153.4	62.6	26.6	1	10.1	absence	absence	absence	25.7	40
women	77	157.8	64.3	25.8	10	9.5	absence	absence	absence	10	15.9744
women	77	150.5	56	24.7	10	10.5	absence	absence	absence	15.8	39.5
women	77	140	58	29.6	1	10.5	absence	absence	absence	23.4	41.7857
women	77	150	40	17.8	13	10.2	absence	presence	absence	12.9	22.2414
women	78	142.8	48.1	23.6	8	8	absence	absence	absence	14.8	30.5785
women	78	144.9	48.4	23.1	7	7	absence	absence	presence	13	27.027
women	78	151.9	42.8	18.5	4	14.3	presence	absence	presence	26.8	55.6017
women	78	149	48.2	21.7	30	8.4	absence	presence	absence	17.6	41.1215
women	80	147	37.6	17.4	2	7.1	absence	absence	absence	14.7	27.2222
women	80	151.5	54	23.5	0	5.8	absence	absence	absence	17.6	33.6842
women	80	150	45	20	5	12.1	absence	absence	presence	11.1	29.5213
women	80	150.5	52.3	23.1	8	6.6	absence	absence	presence	8.8	25.2874
women	80	141.6	34.8	17.4	39	11.2	presence	presence	absence	15.4	34.2222
women	81	148	62	28.3	8	8.2	absence	absence	absence	13.7	22.0968
women	84	154	51.8	21.8	3	13.7	absence	absence	absence	16.4	29.078
women	84	146.3	33	15.4	10	9.2	absence	absence	absence	11.6	35.1515
women	84	140.6	56.4	28.5	20	8.5	absence	presence	presence	14.8	26.4286
women	84	152	56	24.2	1	10.2	presence	presence	absence	12.4	23.9382
women	85	146	43.5	20.4	10	6.1	absence	absence	absence	15	34.4828
women	86	143.2	43.2	21.1	1	6.7	absence	absence	presence	13.9	32.1759
